# Supplementary material for: Effect of Selective Heart Rate Slowing in Heart Failure With Preserved Ejection Fraction
Source: PubMed Central journal article supplement — Circulation. 2015 Sep 2;132(18):1719–25. doi: 10.1161/CIRCULATIONAHA.115.017119 (PMC4640051; doi:10.1161/circulationaha.115.017119), 2015-09-02
Supplement: cir-132-1719-s002.pdf [file cir-132-1719-s002.pdf]

## **SUPPLEMENTAL MATERIAL**

## SUPPLEMENTAL METHODS

Resting transthoracic echocardiography was undertaken using a Philips iE33 system (Philips Medical Systems, The Netherlands) in accordance with ESC guidelines.<sup>1</sup> Diastolic evaluation was in accordance with joint recommendations of the European Association and American Society of Echocardiography<sup>2</sup> and included measurement of peak early (E) and late (A) diastolic mitral inflow velocities, the deceleration time of the early filling velocity (DT), tissue Doppler mitral annular early (e') and late (a') diastolic velocities with subsequent calculation of E/e' (e' taken as average of septal and lateral annular velocities). All measurements were averaged from three consecutive cardiac cycles and images acquired by the same experienced sonographer for each subject at every visit.

Cardiopulmonary exercise testing was undertaken using a symptom-limited erect treadmill or bicycle exercise protocol (according to patient suitability) with simultaneous respiratory gas analysis, as described.<sup>3,4</sup> All exercise protocols were undertaken on the same platform once selected for an individual patient. Direct measurements of oxygen consumption ( $VO_2$ ), carbon dioxide production ( $V_{CO_2}$ ) and minute ventilation ( $V_E$ ) were made. An incremental protocol was utilised whereby speed and inclination (for treadmill exercise) or resistance and speed (for bicycle exercise) were gradually increased every minute during continual blood pressure and ECG measurement. Subjects were encouraged to exercise to exhaustion, with a corresponding adequate respiratory exchange ratio achieved as a requirement for satisfactory effort. Exercise was terminated at subject request due to fatigue or dyspnoea. Peak oxygen consumption ( $VO_{2\text{ peak}}$ ) was determined by averaging  $VO_2$  measures over 30 seconds of peak exercise. The oxygen uptake efficiency slope was defined as the regression slope ( $a$ ) of  $VO_2$  against  $V_E$  plotted on a semilogarithmic scale such that  $VO_2 = a \log V_E + b$ .<sup>5</sup>

CMR at Oxford was performed on a Siemens 3T Trio MR system (Erlangen, Germany) for assessment of cardiac volumes, mass and function from SSFP short-axis stacks using Argus post-processing software (Siemens Healthcare, Erlangen, Germany) only in the HFpEF cohort. In Aberdeen, a similar protocol was performed on a 1.5 T Philips Intera and

Achieva systems (Philips Medical Systems, Best, The Netherlands). Cine images were acquired using standard Steady State Free Precession (SSFP) imaging. For  $^{31}\text{P}$  spectroscopy, subjects were placed in the prone position, with the heart approximately centred on the middle of a  $^{31}\text{P}$  coil.  $^{31}\text{P}$ -MR spectroscopy was performed with 3D acquisition-weighted chemical shift imaging, using ultra-short time (UTE)-CSI. Correction factors for saturation and muscle contamination were applied. The area under each resonance is proportional to the amount of each  $^{31}\text{P}$  nucleus species in the heart, allowing direct quantification of the relative concentrations of ATP and phosphocreatine.

Exclusion criteria for both cohorts included: LV EF < 50%; inability to perform exercise testing; inability to tolerate CMR, e.g. due to claustrophobia or inability to lie flat; contraindications to CMR, including the presence of implantable devices, internal cardioverter-defibrillator, cranial aneurysm clip, metallic ocular foreign body or known hypersensitivity to gadolinium; the presence of other significant cardiac disease, including ischemic, valvular, pericardial disease or cardiomyopathy (hypertrophic, dilated or restrictive); asthma; second or third degree atrioventricular block; sick sinus syndrome; atrial fibrillation; significant resting bradycardia (heart rate < 60 beats/minute); objective evidence of lung disease on lung function testing; or significant renal impairment (estimated GFR < 30 mL per minute per 1.73 m<sup>2</sup> body surface area).

The hypertensive patient cohort were aged 60 years of age or older, with no symptoms or clinical signs of heart failure, normal LV EF with no significant valvular disease on screening echocardiography and no known cardiac or respiratory disease. Subjects were recruited prospectively from a large on-going hypertension database.

**Supplemental Table 1: Baseline Echocardiographic Characteristics of the HFpEF Cohort**

|                                                    | <b>HFpEF<br/>(n = 22)</b> |
|----------------------------------------------------|---------------------------|
| LV ejection fraction (%)                           | 64.5 ± 7.9                |
| LV end-diastolic volume index (mL/m <sup>2</sup> ) | 36.4 (30.6 – 42.2)        |
| LA volume index (mL/m <sup>2</sup> )               | 28.0 ± 12.3               |
| LV mass index (g/m <sup>2</sup> )                  | 109.0 ± 25.3              |
| E/A ratio                                          | 0.7 (0.6 – 1.1)           |
| E wave deceleration time, ms                       | 185 ± 67                  |
| e' (mean of septal and lateral), cm/s              | 5.2 ± 1.5                 |
| E/e' ratio                                         | 11.1 ± 2.4                |

Values are mean ± SD, percentages or median (quartiles 1 to 3). LV = left ventricular; LA = left atrial; E = peak early diastolic mitral flow velocity; A = late diastolic mitral flow velocity; e' = peak early diastolic mitral annular velocity.

**Supplemental Table 2: Effect of Ivabradine versus Placebo on Resting Hemodynamic, Cardiac imaging and Exercise Parameters in the HFpEF Cohort**

|                                                        | <b>Placebo<br/>(n = 22)</b> | <b>Ivabradine<br/>(n = 22)</b> |
|--------------------------------------------------------|-----------------------------|--------------------------------|
| Heart rate, beats/min (rest)                           | 77 ± 13                     | 57 ± 9                         |
| Heart rate, beats/min (exercise)                       | 129 ± 20                    | 107 ± 18                       |
| Systolic BP, mmHg                                      | 142 ± 25                    | 149 ± 28                       |
| Diastolic BP, mmHg                                     | 79 ± 12                     | 76 ± 10                        |
| LV end-diastolic volume index (mL/m <sup>2</sup> )     | 30.3 (26.7 – 40.0)          | 29.0 (25.8 – 40.0)             |
| LA volume index (mL/m <sup>2</sup> )                   | 27.0 ± 10.7                 | 31.3 ± 12.2                    |
| LV mass index (g/m <sup>2</sup> )                      | 109.0 ± 29.1                | 102.0 ± 22.5                   |
| E/A ratio                                              | 0.60 (0.50 – 0.70)          | 0.65 (0.56 – 1.08)             |
| E wave deceleration time, ms                           | 170 ± 44                    | 177 ± 52                       |
| V <sub>E</sub> /V <sub>CO2</sub>                       | 36.1 ± 6.5                  | 36.1 ± 6.1                     |
| Anaerobic Threshold (mL/kg/min)                        | 11.5 ± 2.9                  | 10.4 ± 2.5                     |
| RER                                                    | 1.1 ± 0.1                   | 1.1 ± 0.1                      |
| OUES                                                   | 1834 ± 563                  | 1621 ± 347                     |
| MRI LV ejection fraction (%)                           | 74.1 ± 6.4                  | 73.9 ± 7.2                     |
| MRI LV end-diastolic volume index (mL/m <sup>2</sup> ) | 60.8 ± 11.7                 | 64.8 ± 11.7                    |
| MRI LV end-systolic volume index (mL/m <sup>2</sup> )  | 16.3 ± 6.7                  | 17.5 ± 7.7                     |
| MRI LV mass index (g/m <sup>2</sup> )                  | 53.7 ± 12.3                 | 52.1 ± 12.4                    |
| MRS PCr/ATP ratio                                      | 1.69 ± 0.41                 | 1.68 ± 0.39                    |

Values are mean  $\pm$  SD, percentages or median (quartiles 1 to 3). BP = blood pressure; LV = left ventricular; LA = left atrial; E = peak early diastolic mitral flow velocity; A = late diastolic mitral flow velocity;  $V_E/V_{CO_2}$  = minute ventilation-carbon dioxide production ratio; RER = respiratory exchange ratio; OUES = oxygen uptake efficiency slope; MRI = Magnetic Resonance Imaging;

**Supplemental Table 3: Effect of Ivabradine versus Placebo on Resting Hemodynamic, Cardiac Imaging and Exercise Parameters in the Asymptomatic Hypertensive Cohort**

|                                                        | <b>Placebo</b><br><b>(n = 22)</b> | <b>Ivabradine</b><br><b>(n = 22)</b> |
|--------------------------------------------------------|-----------------------------------|--------------------------------------|
| Heart rate, beats/min (rest)                           | 74 ± 14                           | 61 ± 11                              |
| Heart rate, beats/min (exercise)                       | 145 ± 21                          | 127 ± 23                             |
| Systolic BP, mmHg                                      | 136 ± 19                          | 144 ± 14                             |
| Diastolic BP, mmHg                                     | 83 ± 13                           | 75 ± 13                              |
| LV end-diastolic volume index (mL/m <sup>2</sup> )     | 40.9 (28.4 – 55.0)                | 40.6 (34.7 – 58.0)                   |
| LA volume index (mL/m <sup>2</sup> )                   | 34.9 ± 14.1                       | 40 ± 12.7                            |
| LV mass index (g/m <sup>2</sup> )                      | 85.7 ± 26.9                       | 89.7 ± 24.1                          |
| E/A ratio                                              | 0.84 ± 0.18                       | 0.93 ± 0.19                          |
| E wave deceleration time, ms                           | 248 ± 56                          | 269 ± 72                             |
| V <sub>E</sub> /V <sub>CO2</sub>                       | 27.4 ± 3.4                        | 29.2 ± 3.5                           |
| Anaerobic Threshold (mL/kg/min)                        | 19.7 ± 5.9                        | 19.4 ± 5.6                           |
| RER                                                    | 1.2 ± 0.1                         | 1.2 ± 0                              |
| OUES                                                   | 1953 ± 511                        | 1990 ± 447                           |
| MRI LV ejection fraction (%)                           | 65.0 ± 6.6                        | 68.0 ± 7.4                           |
| MRI LV end-diastolic volume index (mL/m <sup>2</sup> ) | 60.7 ± 20.1                       | 61.6 ± 21.5                          |
| MRI LV end-systolic volume index (mL/m <sup>2</sup> )  | 24.5 ± 8.3                        | 22.8 ± 8.6                           |
| MRI LV mass index (g/m <sup>2</sup> )                  | 101.0 ± 21.2                      | 107.0 ± 20.3                         |
| MRS PCr/ATP ratio                                      | 1.81 ± 0.84                       | 1.49 ± 0.69                          |

Values are mean  $\pm$  SD, percentages or median (quartiles 1 to 3). BP = blood pressure; LV = left ventricular; LA = left atrial; E = peak early diastolic mitral flow velocity; A = late diastolic mitral flow velocity;  $V_E/V_{CO_2}$ , minute ventilation-carbon dioxide production ratio; RER = respiratory exchange ratio; OUES = oxygen uptake efficiency slope; MRI = Magnetic Resonance Imaging;



**Supplemental Figure 1: Effect of Ivabradine on Selected Parameters of Exercise Performance in HFpEF and Asymptomatic Hypertensive Cohort**

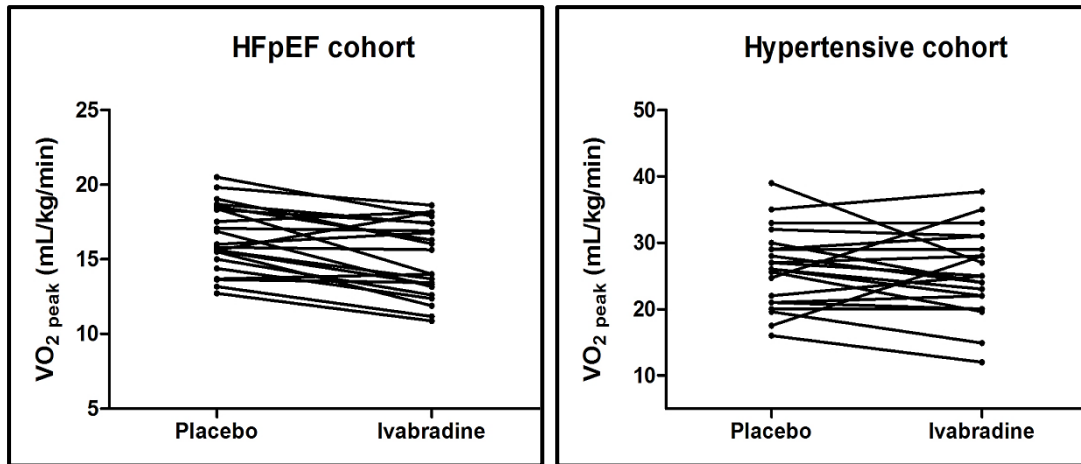

The figures above depict the change in VO<sub>2</sub> peak (mL/kg/min) from Placebo to Ivabradine in the HFpEF (left) and Hypertensive (right) cohorts (comparison is made between the VO<sub>2</sub> peak values at the end of each intervention arm).

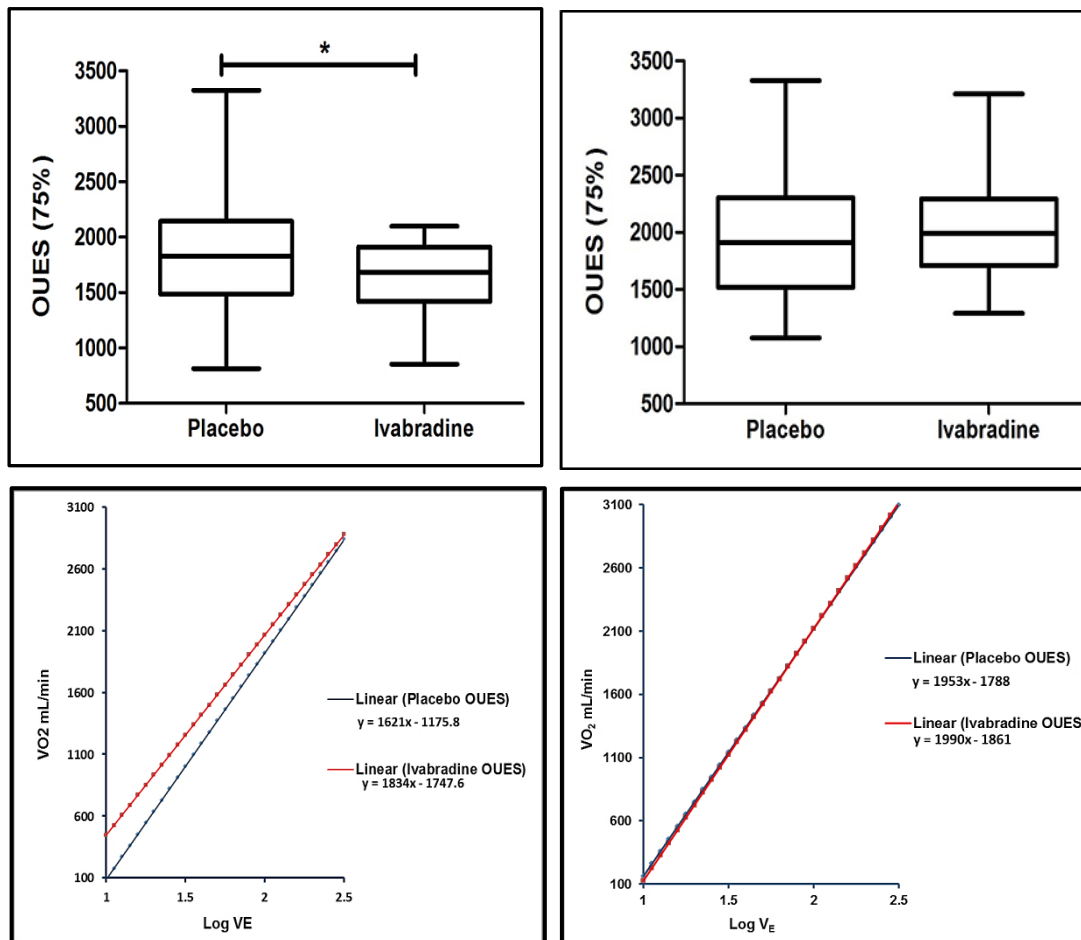

**The figures above show the effect of Placebo and Ivabradine on oxygen uptake efficiency slope (OUES) in the HFpEF (left) and Hypertensive (right) cohorts.**

## SUPPLEMENTAL REFERENCES

1. Evangelista A, Flachskampf F, Lancellotti P, Badano L, Aguilar R, Monaghan M, Zamorano J, Nihoyannopoulos P and European Association of E. European Association of Echocardiography recommendations for standardization of performance, digital storage and reporting of echocardiographic studies. *European journal of echocardiography : the journal of the Working Group on Echocardiography of the European Society of Cardiology*. 2008;9:438-48.
2. Nagueh SF, Appleton CP, Gillebert TC, Marino PN, Oh JK, Smiseth OA, Waggoner AD, Flachskampf FA, Pellikka PA and Evangelista A. Recommendations for the evaluation of left ventricular diastolic function by echocardiography. *Journal of the American Society of Echocardiography : official publication of the American Society of Echocardiography*. 2009;22:107-33.
3. Phan TT, Abozguia K, Nallur Shivu G, Mahadevan G, Ahmed I, Williams L, Dwivedi G, Patel K, Steendijk P, Ashrafian H, Henning A and Frenneaux M. Heart failure with preserved ejection fraction is characterized by dynamic impairment of active relaxation and contraction of the left ventricle on exercise and associated with myocardial energy deficiency. *J Am Coll Cardiol*. 2009;54:402-9.
4. Phan TT, Shivu GN, Abozguia K, Davies C, Nassimizadeh M, Jimenez D, Weaver R, Ahmed I and Frenneaux M. Impaired heart rate recovery and chronotropic incompetence in patients with heart failure with preserved ejection fraction. *Circ Heart Fail*. 2010;3:29-34.
5. Baba R, Nagashima M, Goto M, Nagano Y, Yokota M, Tauchi N and Nishibata K. Oxygen uptake efficiency slope: a new index of cardiorespiratory functional reserve derived from the relation between oxygen uptake and minute ventilation during incremental exercise. *J Am Coll Cardiol*. 1996;28:1567-72.
